# Supplementary material for: Hypothyroidism, comorbidity and health-related quality of life: a population-based study
Source: PubMed Central journal article supplement — Endocr Connect. 2023 Nov 8;12(12):e230266. doi: 10.1530/EC-23-0266 (PMC10692699; doi:10.1530/ec-23-0266), 2023-11-08

**Supplementary Table 1. An overview of the single morbidities with their definitions and the disease domains.**

| <b>Infectious and parasitic diseases</b>                                                                                                                               | <b>Neoplasms</b>                                                                                                                               | <b>Diseases of the blood and blood-forming organs</b>                                                                                                                                                                                                                                                                                                                                                                                                                                   |
|------------------------------------------------------------------------------------------------------------------------------------------------------------------------|------------------------------------------------------------------------------------------------------------------------------------------------|-----------------------------------------------------------------------------------------------------------------------------------------------------------------------------------------------------------------------------------------------------------------------------------------------------------------------------------------------------------------------------------------------------------------------------------------------------------------------------------------|
| Use systemic antiinfectives<br><br>Systemic antiinfectives = ATC code J                                                                                                | Self-reported cancer (excluding non-melanoma skin cancer)                                                                                      | Anemia:<br>- Self-reported <b>and</b> use of anti-anemic preparations <b>or</b><br>- Hemoglobin concentration <13 g/dl in men <b>or</b><br>- Hemoglobin concentration <12 g/dl in women<br><br>Bleeding disorder:<br>- Self-reported <b>and</b> use of anti-thrombotic drugs <b>or</b><br>- Self-reported <b>and</b> use of anti-hemorrhagic drugs<br><br>Anti-anemic preparations = ATC code B03; anti-thrombotic drugs = ATC code B01AA, B01AB; anti-hemorrhagic drugs = ATC-code B02 |
| <b>Endocrine, nutritional and metabolic diseases</b>                                                                                                                   | <b>Mental, behavioral and neurodevelopmental disorders</b>                                                                                     | <b>Diseases of the nervous system</b>                                                                                                                                                                                                                                                                                                                                                                                                                                                   |
| Diabetes:<br>- Self-reported <b>or</b><br>- Use of oral blood-glucose lowering agents and/or insulin <b>or</b><br>- Fasting glucose levels $\geq 7.0$ mmol/L <b>or</b> | Depression:<br>If MINI available:<br>- Current depressive disorder <b>and</b> use of antidepressants<br>- Dysthymic disorder <b>and</b> use of | Dementia / Alzheimer's disease:<br>- Self-reported <b>or</b><br>- MMSE-score <24 if education level low/medium <b>and</b> age $\geq 65$ years <b>or</b><br>- MMSE-score <25 if education level high <b>and</b>                                                                                                                                                                                                                                                                          |

- Non-fasting glucose level  $\geq 11.1$  mmol/L

Hypercholesterolemia:

- Self-reported myocardial infarction **and** cholesterol  $\geq 5.0$  mmol/L **or**
- Use of lipid lowering medication **or**
- Cholesterol  $\geq 6.5$  mmol/L

Endocrine gland disorder:

- Use of hydrocortisone
- Use of somatropin/somatropin agonist
- Use of desmopressin

Insulin = ATC code A10A; oral blood-glucose lowering agents = ATC code A10B; lipid lowering medication = ATC C10A, C10B; hydrocortisone = ATC code H02AB09; somatropin/somatropin agonist = ATC code H01CB; desmopressin = ATC code H01BA02

### Diseases of the eye and adnexa

Cataract:

- Self-reported

Glaucoma:

- Use of antiglaucoma preparations

antidepressants

If MINI not available:

- Self-reported **and** use of antidepressants

Anxiety disorder:

If MINI available:

- Any anxiety disorder

If MINI not available:

- Self-reported

Schizophrenia:

- Self-reported

Attention-deficit/hyperactivity disorder (ADHD):

- Self-reported

Antidepressants = ATC-code N06A

### Diseases of the ear and mastoid process

Chronic sinusitis of throat and/or nose:

- Self-reported **and** use of local or systemic decongestive drugs

age  $\geq 65$  years

Migraine:

- Self-reported

Epilepsy:

- Self-reported **and** use of anti-epileptics

Back or neck hernia:

- Self-reported

Parkinson's disease:

- Self-reported **and** use of anti-Parkinson's drugs

Multiple sclerosis:

- Self-reported

Spasticity:

- Self-reported

Anti-epileptics = ATC-code N03; anti-Parkinson's drugs = ATC-code N04

### Diseases of the circulatory system

Hypertension:

- Blood pressure  $>140/90$  mmHg **or**
- Use of anti-hypertensive medication

Heart failure:

Severe limitations due to eyesight:  
- Self-reported

Antiglaucoma preparations = S01E

Severe hearing impairment

- Self-reported

Local or systemic decongestive drugs = ATC  
code R01

- Self-reported **and** use of (any) heart failure-  
related medication

- Self-reported heart transplant

- Self-reported pacemaker

Vascular disease:

- Self-reported myocardial infarction, stroke,  
PCI & CABG **and** use of vitamin K antagonists  
**or**

- Self-reported myocardial infarction, stroke,  
PCI & CABG **and** use of ascal/acetylsalicylic  
acid **or**

- Self-reported myocardial infarction, stroke,  
PCI & CABG **and** use of clopidogrel

Atrial fibrillation:

- Self-reported as 'diagnosed by a MD' **and**  
use of vitamin K antagonists **or**

- Self-reported pacemaker

Thrombosis:

- Self-reported **and** use of anti-thrombotic  
drugs

Lung emboli:

- Self-reported **and** use of anti-thrombotic  
drugs

Anti-hypertensive medication = ATC code  
C02, C03, C04, C07, C08, C09; heart failure-

### Diseases of the respiratory system

Asthma:

- Doctors diagnosed asthma **or**
- 2 or more self-reported symptoms of: wheeze, attacks at rest, woken by an attack **and** use of asthma /COPD medication **or**
- Self-reported asthma **and** use of asthma/COPD medication COPD

Chronic obstructive pulmonary disease (COPD):

- If spirometry available: GOLD classification: I-IV in ever smokers (current or ex) **or**
- If spirometry not available: self-reported COPD **and** use of asthma/COPD medication **and** age >40 in ever smokers (current or ex)

Chronic mucus hypersecretion/chronic bronchitis:

- Phlegm production during day or night,

### Diseases of the digestive system

Liver disease:

- Self-reported liver cirrhosis

Inflammatory bowel disease:

- Self-reported ulcerative colitis **or**
- Self-reported Morbus Crohn

Celiac disease:

- Self-reported

Gastric disease:

- Self-reported ulcer pepticum **and** use of H2-antagonists, prostaglandins, protonpumpinhibitors (PPI)

Irritable bowel syndrome:

- Self-reported

H2-antagonists, prostaglandins, protonpumpinhibitors = ATC code A02

related medication = ATC code C03, C07, C08, C09; vitamin K antagonists = ATC B01AA; ascal/acetylsalicylic acid = B01AC06, B01AC08; clopidogrel = B01AC04; anti-thrombotic drugs = ATC code B01AA, B01AB

### Diseases of the skin and subcutaneous tissue

Acne:

- Self-reported severe acne **and** use of acne suppressor

Eczema:

- Self-reported **and** use of emollients and/or dermatological corticosteroids

Psoriasis:

- Self-reported psoriasis **and** use of psoriasis suppressor

Acne suppressor = ATC code D10; Emollients and/or dermatological corticosteroids = ATC code D02; Psoriasis suppressor = ATC code D05

or immediately after waking up during at least 3 months/year

Asthma/COPD medication = ATC code R03

**Diseases of the musculoskeletal system and connective tissue**

Osteoarthritis:

- Self-reported **and** use of analgesics **or**
- Self-reported symptoms of pain in hands & feet **and** use of analgesics **or**
- Self-reported symptoms of joint stiffness **and** use of analgesics

Gout:

- Use of anti-gout medication

Osteoporosis:

- Self-reported **and** use of calci chew D3 **and** bisphosphonates **or**
- Self-reported **and** use of denosumab

Rheumatoid arthritis:

- Self-reported **and** use of NSAIDS/DMARDS/ biological/methotrexate **or**
- 2 or more self-reported symptoms of pain in hands & feet or joint stiffness **and** use of NSAIDS/DMARDS/ biological/methotrexate

**Diseases of the genitourinary system**

Chronic bladder infection:

- Self-reported **and** use of anti-microbial drugs

Benign prostatic hypertrophy:

- Use of benign prostatic hypertrophy-related drugs

Hysterectomy or surgical extirpation of 2 ovaries:

- Self-reported

Impaired renal function:

- eGFR  $\geq 60$  ml/min/1.73m<sup>2</sup> with albuminuria (>30 mg/24h) if available **or**
- eGFR <60 ml/min/1.73m<sup>2</sup> **or**
- Kidney transplant

Kidney stones:

- Self-reported

Anti-microbial drugs = ATC code G01; Benign prostatic hypertrophy-related drugs = ATC code G04C

Fibromyalgia:

- Self-reported

Hip fracture in last 12 months:

- Self-reported

Analgesics = ATC-code N02A, N02BE01, M01AB, M01AE; Anti-gout medication = ATC code M04; Calci Chew D3 = ATC code A12XA; Bisphosphonates = ATC code M05AB, M05BB; Denosumab = ATC code M05BX04; NSAIDS = ATC code M01AB, M01AE; DMARDS = ATC code M01; Biological = ATC code L04AB, L04AC, L04AA24, L01XC02; methotrexate = ATC code L01BA01

**Supplementary Table 2. The odds ratios for having a lower score than the (age- and sex-specific) 25th percentile cut-off per HRQoL dimension, according to affected disease domains.**

|                                                              | Physical functioning |         | Social functioning |         | Physical role functioning |         | Emotional role functioning |         |
|--------------------------------------------------------------|----------------------|---------|--------------------|---------|---------------------------|---------|----------------------------|---------|
|                                                              | OR (95% CI)          | P-value | OR (95% CI)        | P-value | OR (95% CI)               | P-value | OR (95% CI)                | P-value |
| <b>Infectious diseases</b>                                   | 1.42 (1.27-1.58)     | <0.001  | 1.42 (1.28-1.57)   | <0.001  | 1.52 (1.35-1.70)          | <0.001  | 1.17 (1.02-1.35)           | 0.024   |
| <b>Neoplasms</b>                                             | 1.13 (1.05-1.22)     | 0.001   | 1.15 (1.28-1.57)   | <0.001  | 1.37 (1.27-1.48)          | <0.001  | 1.10 (1.00-1.21)           | 0.049   |
| <b>Blood and blood-forming organs diseases</b>               | 1.19 (1.12-1.26)     | <0.001  | 1.04 (0.98-1.09)   | 0.23    | 1.23 (1.16-1.52)          | <0.001  | 1.24 (1.08-1.24)           | <0.001  |
| <b>Endocrine, nutritional and metabolic diseases</b>         | 1.02 (0.98-1.05)     | 0.32    | 1.08 (1.04-1.11)   | <0.001  | 1.10 (1.06-1.14)          | <0.001  | 0.97 (0.93-1.02)           | 0.22    |
| <b>Mental, behavioral and neurodevelopmental disorders</b>   | 1.91 (1.84-1.99)     | <0.001  | 4.02 (3.87-4.18)   | <0.001  | 2.44 (2.35-2.54)          | <0.001  | 5.99 (5.76-6.23)           | <0.001  |
| <b>Nervous system diseases</b>                               | 1.52 (1.48-1.56)     | <0.001  | 1.41 (1.42-1.53)   | <0.001  | 1.65 (1.60-1.70)          | <0.001  | 1.25 (1.20-1.30)           | <0.001  |
| <b>Diseases of the eye and adnexa</b>                        | 1.13 (1.05-1.22)     | 0.001   | 1.16 (1.08-1.24)   | <0.001  | 1.35 (1.26-1.46)          | <0.001  | 1.24 (1.13-1.35)           | <0.001  |
| <b>Diseases of the ear and mastoid process</b>               | 1.50 (1.36-1.65)     | <0.001  | 1.67 (1.53-1.84)   | <0.001  | 1.80 (1.63-1.98)          | <0.001  | 1.30 (1.16-1.46)           | <0.001  |
| <b>Circulatory system diseases</b>                           | 0.99 (0.96-1.02)     | 0.36    | 1.03 (1.00-1.06)   | 0.042   | 1.00 (0.97-1.04)          | 0.86    | 0.87 (0.84-0.91)           | <0.001  |
| <b>Respiratory system diseases</b>                           | 1.65 (1.61-1.70)     | <0.001  | 1.33 (1.30-1.37)   | <0.001  | 1.44 (1.40-1.49)          | <0.001  | 1.22 (1.17-1.27)           | <0.001  |
| <b>Digestive system diseases</b>                             | 1.51 (1.45-1.57)     | <0.001  | 1.47 (1.42-1.53)   | <0.001  | 1.68 (1.61-1.75)          | <0.001  | 1.40 (1.34-1.47)           | <0.001  |
| <b>Skin and subcutaneous tissue diseases</b>                 | 1.32 (1.13-1.53)     | <0.001  | 1.18 (1.02-1.37)   | 0.024   | 1.29 (1.00-1.52)          | 0.002   | 1.50 (1.25-1.80)           | <0.001  |
| <b>Musculoskeletal system and connective tissue diseases</b> | 4.85 (4.60-5.12)     | <0.001  | 2.30 (2.19-2.42)   | <0.001  | 3.93 (3.74-4.14)          | <0.001  | 1.49 (1.40-1.58)           | <0.001  |

|                                                              |                      |                |                    |                |                    |                |                       |                |
|--------------------------------------------------------------|----------------------|----------------|--------------------|----------------|--------------------|----------------|-----------------------|----------------|
| <b>Genitourinary system diseases</b>                         | 0.98 (0.94-1.03)     | 0.48           | 0.94 (0.90-0.98)   | 0.008          | 1.18 (1.12-1.24)   | <0.001         | 1.04 (0.98-1.10)      | 0.25           |
|                                                              | <b>Mental health</b> |                | <b>Vitality</b>    |                | <b>Bodily pain</b> |                | <b>General health</b> |                |
|                                                              | <b>OR (95% CI)</b>   | <b>P-value</b> | <b>OR (95% CI)</b> | <b>P-value</b> | <b>OR (95% CI)</b> | <b>P-value</b> | <b>OR (95% CI)</b>    | <b>P-value</b> |
| <b>Infectious diseases</b>                                   | 1.12 (1.00-1.25)     | 0.042          | 1.28 (1.15-1.43)   | <0.001         | 1.60 (1.43-1.78)   | <0.001         | 1.56 (1.40-1.73)      | <0.001         |
| <b>Neoplasms</b>                                             | 1.07 (1.00-1.15)     | 0.066          | 1.08 (1.01-1.16)   | 0.035          | 1.13 (1.05-1.22)   | 0.001          | 1.31 (1.22-1.41)      | <0.001         |
| <b>Blood and blood-forming organs diseases</b>               | 1.04 (0.98-1.10)     | 0.17           | 0.99 (0.94-1.05)   | 0.82           | 1.14 (1.07-1.21)   | <0.001         | 1.15 (1.09-1.22)      | <0.001         |
| <b>Endocrine, nutritional and metabolic diseases</b>         | 1.07 (1.04-1.11)     | <0.001         | 1.18 (1.14-1.22)   | <0.001         | 1.07 (1.03-1.11)   | <0.001         | 1.14 (1.10-1.18)      | <0.001         |
| <b>Mental, behavioral and neurodevelopmental disorders</b>   | 5.33 (5.13-5.53)     | <0.001         | 3.77 (3.64-3.92)   | <0.001         | 2.10 (2.02-2.18)   | <0.001         | 2.74 (2.64-2.84)      | <0.001         |
| <b>Nervous system diseases</b>                               | 1.20 (1.17-1.24)     | <0.001         | 1.25 (1.21-1.28)   | <0.001         | 1.98 (1.93-2.04)   | <0.001         | 1.39 (1.35-1.43)      | <0.001         |
| <b>Diseases of the eye and adnexa</b>                        | 1.19 (1.11-1.28)     | <0.001         | 1.30 (1.21-1.40)   | <0.001         | 1.14 (1.06-1.23)   | <0.001         | 1.14 (1.06-1.22)      | <0.001         |
| <b>Diseases of the ear and mastoid process</b>               | 1.28 (1.16-1.40)     | <0.001         | 1.63 (1.48-1.79)   | <0.001         | 1.70 (1.54-1.87)   | <0.001         | 1.92 (1.75-2.11)      | <0.001         |
| <b>Circulatory system diseases</b>                           | 1.01 (0.98-1.04)     | 0.48           | 1.09 (1.06-1.12)   | <0.001         | 0.99 (0.96-1.02)   | 0.40           | 1.07 (1.04-1.10)      | <0.001         |
| <b>Respiratory system diseases</b>                           | 1.24 (1.20-1.28)     | <0.001         | 1.38 (1.34-1.42)   | <0.001         | 1.33 (1.29-1.37)   | <0.001         | 1.73 (1.68-1.78)      | <0.001         |
| <b>Digestive system diseases</b>                             | 1.40 (1.35-1.46)     | <0.001         | 1.46 (1.40-1.52)   | <0.001         | 1.85 (1.78-1.92)   | <0.001         | 1.83 (1.77-1.90)      | <0.001         |
| <b>Skin and subcutaneous tissue diseases</b>                 | 1.31 (1.13-1.52)     | <0.001         | 1.16 (1.00-1.36)   | 0.06           | 1.03 (0.87-1.21)   | 0.76           | 1.43 (1.23-1.66)      | <0.001         |
| <b>Musculoskeletal system and connective tissue diseases</b> | 1.36 (1.29-1.43)     | <0.001         | 2.23 (2.12-2.35)   | <0.001         | 6.55 (6.20-6.91)   | <0.001         | 3.05 (2.90-3.21)      | <0.001         |



|                                      |                  |      |                  |       |                  |        |                  |      |
|--------------------------------------|------------------|------|------------------|-------|------------------|--------|------------------|------|
| <b>Genitourinary system diseases</b> | 0.97 (0.93-1.02) | 0.24 | 1.06 (1.01-1.11) | 0.021 | 1.20 (1.14-1.25) | <0.001 | 1.03 (0.98-1.07) | 0.30 |
|--------------------------------------|------------------|------|------------------|-------|------------------|--------|------------------|------|

The model included thyroid hormone use, body mass index, smoking status as covariates. CI, confidence interval; OR, odds ratio.

**SFigure 1. Forest plot demonstrating the odds ratios for having an affected disease domain according to thyroid hormone use and sex.** Logistic regression analyses included age as covariate. Circles indicate odds ratios for each cohort, with horizontal lines corresponding to 95% confidence intervals

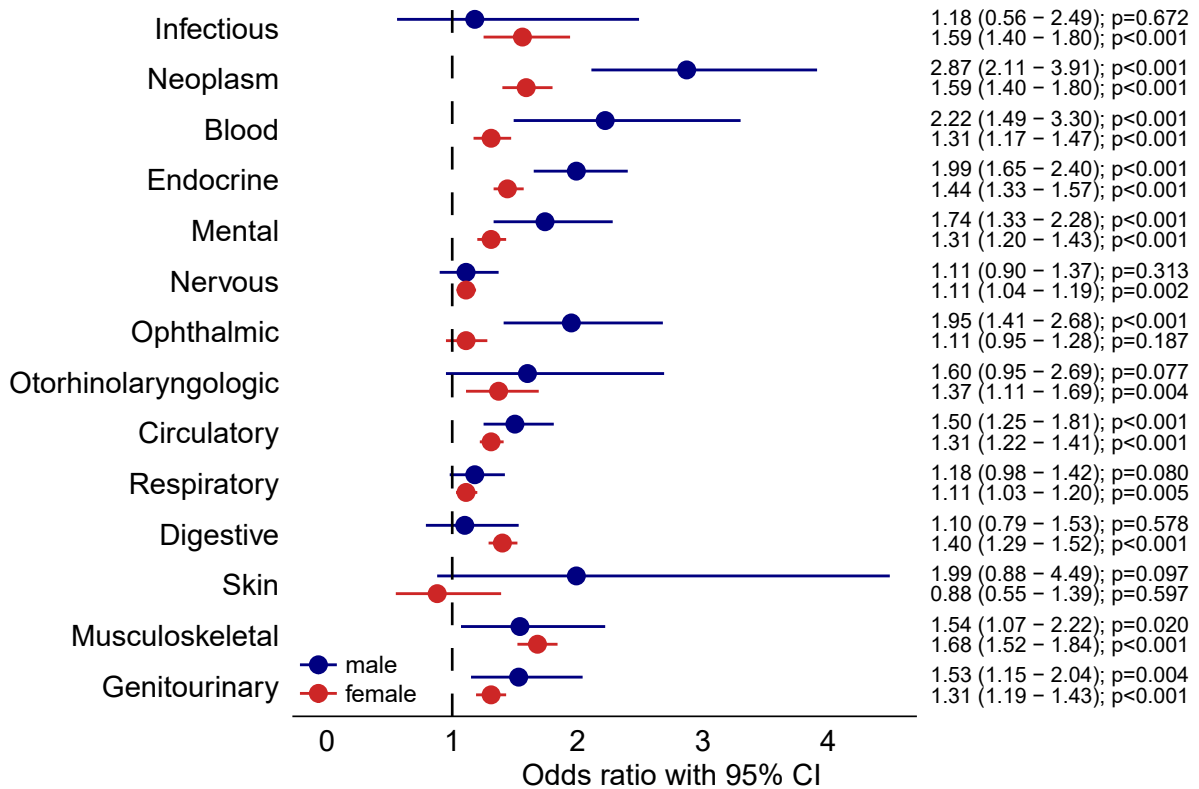

**SFigure 2. Percentage of thyroid hormone users and non-users with an affected single morbidity.**

For benign prostatic hypertrophy the percentage of male thyroid hormone users and male non-users is shown, whereas for gynecologic surgery the percentage of female thyroid hormone users and female non-users is shown. ADHD, attention-deficit/hyperactivity disorder; COPD, chronic obstructive pulmonary disease.

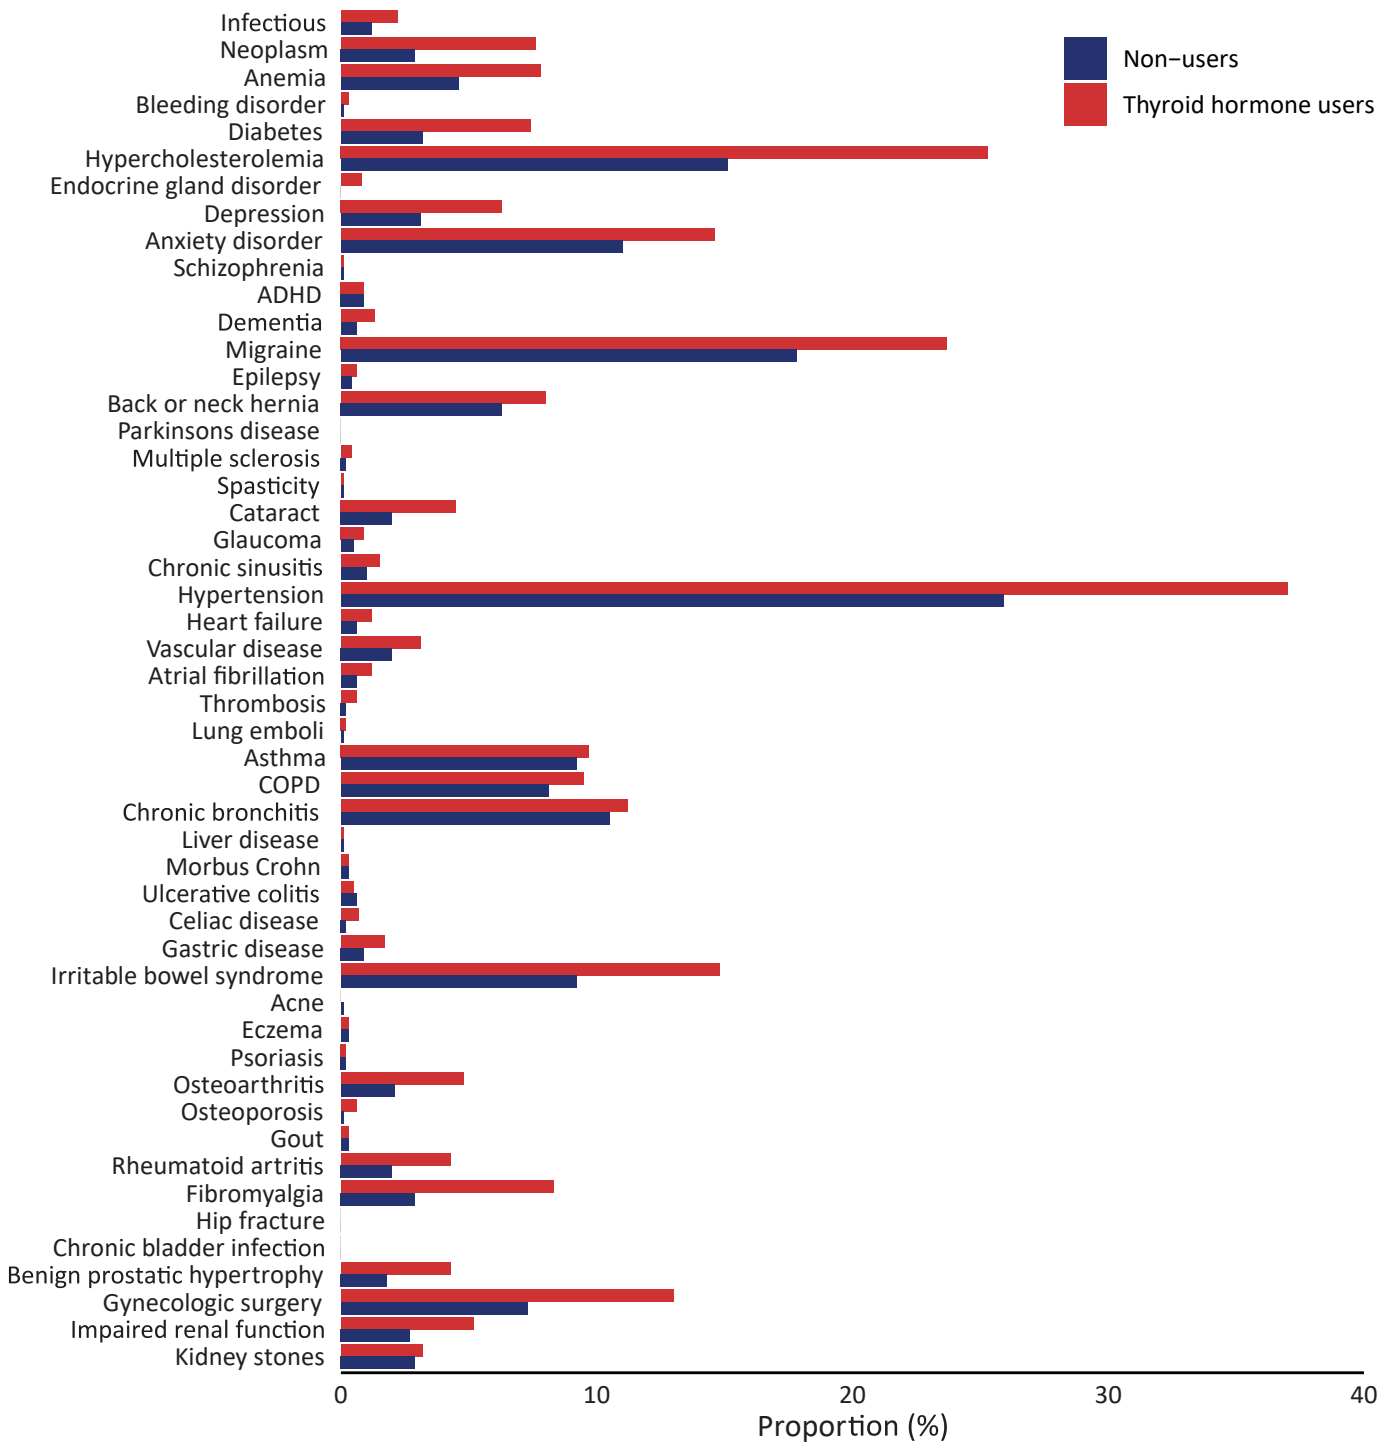

**SFigure 3. Forest plot on a log scale demonstrating the odds ratios for having an affected single morbidity according to thyroid hormone use.** Logistic regression analyses included age and sex as covariates. Circles indicate odds ratios for each cohort, with horizontal lines corresponding to 95% confidence intervals. The analyses concerning benign prostatic hypertrophy and gynecologic surgery were performed for respectively males and females only.

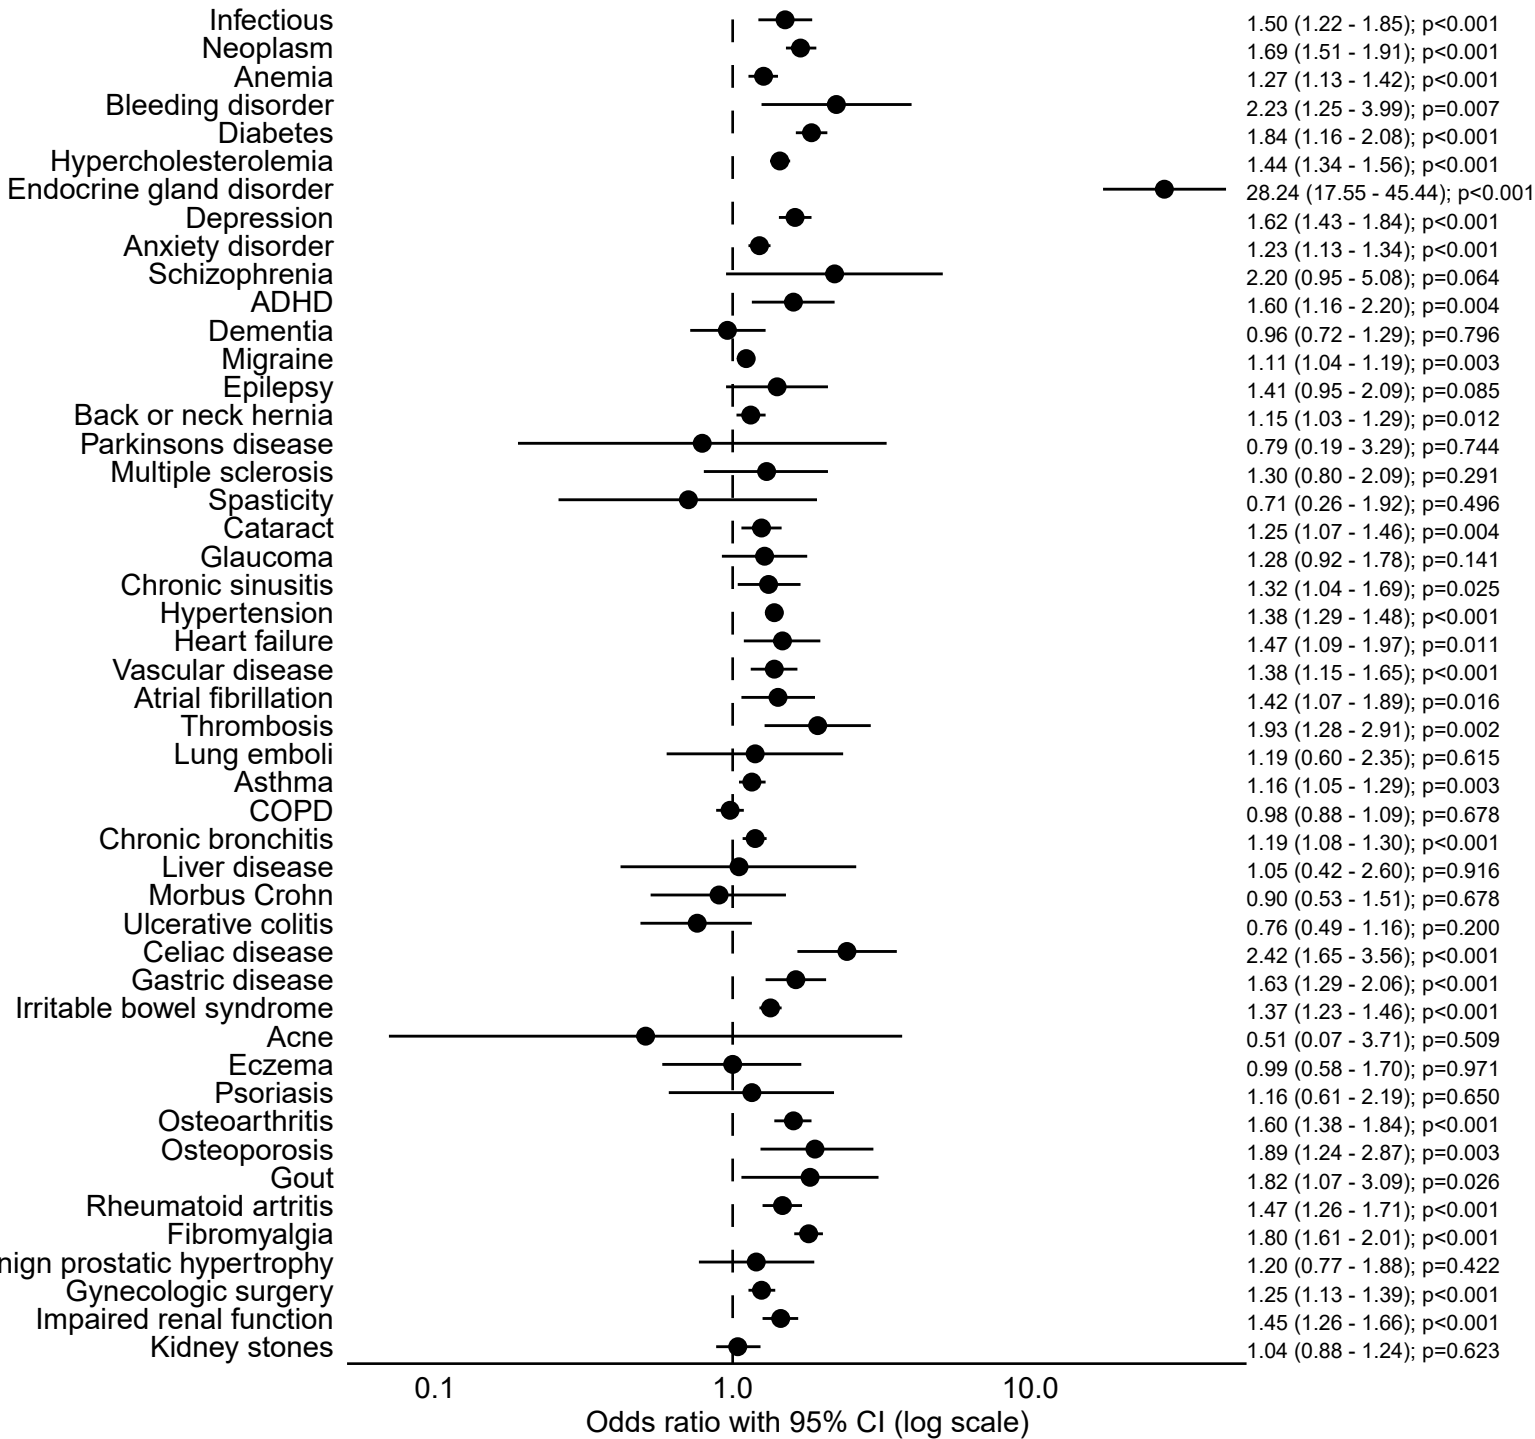

Supplement: supplementary_material.pdf [file supplementary_material.pdf]
